# Supplementary material
Source: Royal Society of Chemistry journal article supplement (doi:10.1039/d5md00819k)
Supplement: d5md00819k1.pdf [file d5md00819k1.pdf]

## Supplementary file

Table S1: Summary of prenatal and corresponding female offspring groups.

| <b>prenatal group</b>      | <b>Treatment (E16–E19)</b>                        | <b>Corresponding offspring groups</b> | <b>Postnatal treatments</b>                     |
|----------------------------|---------------------------------------------------|---------------------------------------|-------------------------------------------------|
| <b>Naïve (n=10)</b>        |                                                   | Naïve control offspring (n=10)        |                                                 |
| <b>Vehicle (n=10)</b>      | 0.5 ml sesame oil, s.c.                           | Vehicle control offspring (n=10)      |                                                 |
| <b>Testosterone (n=10)</b> | Testosterone enanthate 7.5 mg in sesame oil, s.c. | Model offspring (n=10)                |                                                 |
|                            |                                                   | Metformin offspring (n=10)            | Metformin 300 mg/kg/day (last 2 weeks)          |
|                            |                                                   | Levothyroxine offspring (n=10)        | Levothyroxine 50 µg/kg/day, i.p. (last 3 weeks) |
|                            |                                                   | Combined treatment offspring (n=10)   | Metformin + levothyroxine regimen               |
